# Supplementary material for: The single-dose Janssen Ad26.COV2.S COVID-19 vaccine elicited robust and persistent anti-spike IgG antibody responses in a 12-month Ugandan cohort
Source: PubMed Central journal article supplement (PMC11109398; doi:10.3389/fimmu.2024.1384668), 2024-05-08
Supplement: DataSheet_1.pdf [file DataSheet_1.pdf]

## Supplementary Tables

*Supplementary Table 1: Summary of predominant strains of SARS-CoV-2 during the study period.*

| <b>Period</b>             | <b>Predominant Strains (Waves of Variants)</b> |
|---------------------------|------------------------------------------------|
| August 2020-February 2021 | A23.1                                          |
| May 2021-September 2021   | B.1.617.2 (Delta)                              |
| December 2021             | Emergence of Omicron (BA.1 and BA.1.1)         |
| January 2022-March 2022   | BA.1 and BA.1.1                                |
| April 2022-June 2022      | BA.2, BA.2.31, BA.4, BA.4.1 and BA.5.2.1       |
| July 2022-September 2022  | BA.4.1, BA.5.2.1, BQ.1 and XBB.1               |
| October 2022-January 2023 | XBB.1, BQ.1 and XBB.3.2                        |
