# Supplementary material for: The single-dose Janssen Ad26.COV2.S COVID-19 vaccine elicited robust and persistent anti-spike IgG antibody responses in a 12-month Ugandan cohort
Source: PubMed Central journal article supplement (PMC11109398; doi:10.3389/fimmu.2024.1384668), 2024-05-08
Supplement: Presentation_1.pdf [file Presentation_1.pdf]

## Supplementary Figures

### Supplementary Figure 1: Comparative Profiling of Median Spike-Directed Antibody Responses Post-Janssen Janssen Ad26.COV2.S COVID-19 Vaccination Stratified by Baseline S-IgG Seropositivity, excluding all subjects with breakthrough infection

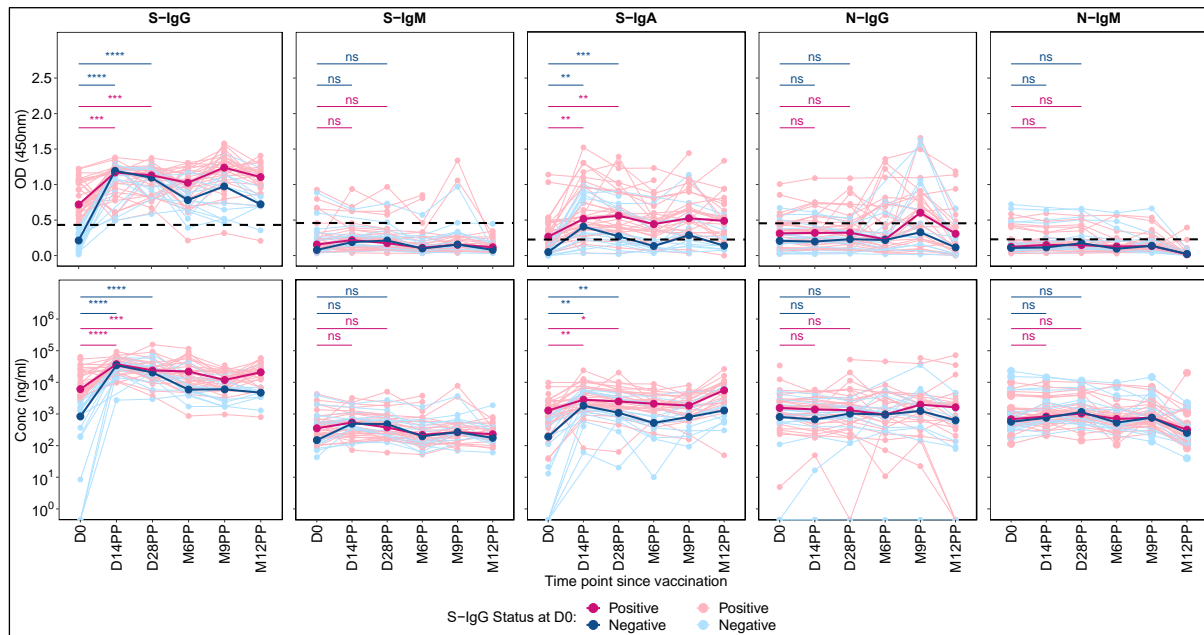

### Supplementary Figure 1: Comparative Profiling of Median Spike-Directed Antibody Responses Post-Janssen Janssen Ad26.COV2.S COVID-19 Vaccination Stratified by Baseline S-IgG Seropositivity, excluding all subjects with breakthrough infection

Supplementary Figure 1 shows Individual profiles of subjects over time categorised by S-IgG baseline seropositivity, excluding break through subjects. Total participants,  $n = 50$ , Baseline S-IgG+,  $n = 34$  and baseline S-IgG-,  $n = 16$ . Subjects are classified as S-IgG positive (shown in red) if their baseline S-IgG levels are at or above the established cutoff value and S-IgG negative (illustrated in blue) if below this threshold. Differences in antibody responses between D0 and D14PP as well as D0 and D28PP for each subgroup were assessed using a Wilcoxon test. Significance bars (red for baseline S-IgG positive and blue for baseline S-IgG negative) indicate the levels of significance; : 'ns' for  $p > 0.05$  (non-significant), '\*' for  $p \leq 0.05$ , '\*\*' for  $p < 0.01$ , '\*\*\*' for  $p < 0.001$ , and '\*\*\*\*' for  $p < 0.0001$ .
